1

2 **Non-random associations of maternally transmitted symbionts in insects: The roles of drift**  
3 **versus co-transmission and selection**

4

5 Mathé-Hubert Hugo<sup>1,\*</sup>, Heidi Kaech<sup>1,2</sup>, Corinne Hertaeg<sup>1,3</sup>, Christoph Vorburger<sup>1,2</sup>

6

7 <sup>1</sup>Eawag, Swiss Federal Institute of Aquatic Science and Technology, Überlandstrasse 133, 8600  
8 Dübendorf, Switzerland

9 <sup>2</sup>Institute of Integrative Biology, Department of Environmental Systems Science, ETH Zürich,  
10 Universitätsstrasse 16, 8092 Zürich, Switzerland

11 <sup>3</sup>Institute of Agricultural Sciences, Department of Environmental Systems Science, ETH Zürich,  
12 Schmelzbergstrasse 9, 8092 Zürich, Switzerland

13

14 \* author for correspondence:

15 Hugo Mathé-Hubert, Tel : +33 977216666 , E-mail: [hugomh@gmx.fr](mailto:hugomh@gmx.fr)

16

17 Short running title: Endosymbiont associations in pea aphids

18

## 19 Abstract

20 Virtually all higher organisms form holobionts with associated microbiota. To understand the  
21 biology of holobionts we need to know how species assemble and interact. Controlled experiments are  
22 suited to study interactions between particular symbionts, but they can only inform about a tiny portion  
23 of the diversity within each species. Alternatively, interactions can be inferred from associations  
24 among symbionts in the field that are more or less frequent than expected under random assortment.  
25 However, random assortment may not be a valid null hypothesis for maternally transmitted symbionts  
26 in finite populations, where drift alone can result in associations. Here we report results from a  
27 European field survey of endosymbionts in the pea aphid (*Acyrtosiphon pisum*), and we develop a  
28 model to study the effect of drift on symbiont associations under different population sizes,  
29 considering varying rates of horizontal and maternal transmission. The model showed that even though  
30 horizontal transmissions and maternal transmission failures tend to randomise symbiont associations,  
31 drift can induce significant departures from random assortment, at least in moderate-sized populations.  
32 Based on these results, we carefully interpret our field survey and we re-visit the association between  
33 *Spiroplasma* and *Wolbachia* in *Drosophila neotestacea* reported by Jaenike *et al.* (2010). For this and  
34 for several significant associations between symbionts in European pea aphids we conclude that under  
35 reasonable assumptions of effective population size, they are indeed likely to be maintained by biased  
36 co-transmission or selection. Our study shows that formulating appropriate null expectations can  
37 strengthen the biological inference from co-occurrence patterns in the field.

38 Keywords: Coalescence, Symbiotic community, *Spiroplasma*, *Acyrtosiphon pisum*, drift

## 39 Introduction

40 Some of the interactions between organisms are so tight and durable that a new level of  
41 organisation has been defined to describe them: the holobiont (Queller & Strassmann 2016). These  
42 interactions are rarely bipartite and instead generally involve a host with a microbial community of  
43 varying degree of complexity. From the host's perspective, these associations often lead to the  
44 acquisition of novel traits, allowing the host to expand its ecological niche (e.g., Oliver *et al.* 2010;

45 Henry *et al.* 2013; Brucker & Bordenstein 2012). Understanding the evolutionary ecology of these  
46 interactions requires identifying how species assemble to form holobionts, both at the ontogenetic and  
47 evolutionary levels.

48 Large-scale screens for well-known species like *Wolbachia*, *Cardinium* or *Spiroplasma* suggest that  
49 the majority of arthropod species are infected with heritable endosymbionts (Zchori-Fein & Perlman  
50 2004; Duron *et al.* 2008; Hilgenboecker *et al.* 2008; Regassa 2014). However, there is considerable  
51 variability in the effects these symbionts have on their hosts and in their prevalence among species.  
52 *Wolbachia* is probably the most widespread of these endosymbionts. It has been estimated to occur in  
53 66% of arthropod species, and it typically has either low (<10%) or very high (>90%) prevalence  
54 within species (Hilgenboecker *et al.* 2008). *Wolbachia* is mainly known as a reproductive parasite  
55 (Werren *et al.* 2008), but it may also protect its host against parasites (e.g., Hedges *et al.* 2008;  
56 Teixeira *et al.* 2008; Faria *et al.* 2016) and is sometimes necessary for successful offspring production  
57 (Dedeine *et al.* 2001; Kremer *et al.* 2009). Other widespread endosymbionts of arthropods are bacteria  
58 of the genus *Spiroplasma*, infecting 4-7% of species, often with a low prevalence (Duron *et al.* 2008;  
59 Regassa 2014). Known effects of *Spiroplasma* also include reproductive parasitism (e.g.: Tabata *et al.*  
60 2011; Sanada-Morimura *et al.* 2013; Anbutsu *et al.* 2016) as well as defense against at least three  
61 different kinds of parasites (Lukasik *et al.* 2013; Xie *et al.* 2014; Ballinger & Perlman 2017; Frago *et*  
62 *al.* 2017).

63 The pea aphid, *Acyrtosiphon pisum*, is one of the main biological models of endosymbiosis. It can  
64 be host to at least eight facultative heritable endosymbionts (Vorburger 2018), including *Spiroplasma*.  
65 Interestingly, Ferrari *et al.* (2012) showed that the communities of facultative symbionts differed  
66 strongly among host plant-associated biotypes of the pea aphid (Peccoud *et al.* 2009), although the  
67 prevalence of *Spiroplasma* is only weakly affected by biotype, which explains only 9% of the variance  
68 (Ferrari *et al.* 2012). A symbiont can spread in a host population as a reproductive parasite, for which  
69 there is some limited evidence from pea aphid *Spiroplasma* (Simon *et al.* 2011), or by providing a  
70 benefit to offset the cost it inflicts on the host. For example, *Spiroplasma* may protect pea aphids

71 against entomopathogenic fungi (Łukasik *et al.* 2013) or parasitoid wasps (Frago *et al.* 2017).  
72 However, this cost-benefit balance varies depending on the environment, which is thought to be the  
73 main reason for the observed polymorphism of facultative symbiont communities. For example,  
74 defensive symbioses depend on the presence of some parasites of the host, and some symbioses help  
75 the host to cope with warm environments (e.g., Russell & Moran 2006). The cost-benefit balance may  
76 also depend on the associations with other symbionts. If two symbionts provide the same service, then  
77 one of them might be redundant and thus too costly to the host. This may be the reason why defensive  
78 bacterial symbionts are less frequent in aphids protected by ants (Henry *et al.* 2015), or why the two  
79 defensive symbionts *Serratia symbiotica* and *Hamiltonella defensa* rarely co-occur in pea aphids  
80 (Oliver *et al.* 2006). Also, interactions between symbionts can lead to non-additive effects in a  
81 symbiont- and host-specific manner, making the outcome of a given association difficult to predict.  
82 For instance, in *A. pisum*, *H. defensa* increases the titer of *S. symbiotica*, but *S. symbiotica* does not  
83 affect the titer of *H. defensa* (Oliver *et al.* 2006). In the presence of *Spiroplasma*, *H. defensa* decreases  
84 the fecundity of its host *A. pisum* while it increases the fecundity of the aphid *Sitobion avenae*  
85 (Łukasik *et al.* 2013).

86 Interactive effects that vary from one symbiont strain to the other limit the utility of controlled  
87 laboratory experiments, which usually include only a few particular strains, for making predictions  
88 about the overall interactions among symbionts in natural populations. For this reason, results from  
89 controlled experiments are often compared to analyses of field surveys (for several examples, see  
90 Zytynska & Weisser 2016). These analyses notably aim at identifying pairs of symbionts for which the  
91 co-occurrence is more or less frequent than expected under the null hypothesis of random assortment  
92 (hereafter, positive and negative associations). Three kinds of mechanisms are generally considered  
93 when trying to explain such deviation from random assortment. Firstly, the symbionts could interact in  
94 a way that increases or decreases the rate of maternal transmission failures (e.g. Rock *et al.* 2017),  
95 which should lead to negative or positive associations, respectively. Secondly, the symbionts could  
96 have an interactive effect on host fitness, enhancing or hindering their co-transmission to the next

97 generation (e.g. Oliver *et al.* 2006). Thirdly, Jaenike (2012) and Smith *et al.* (2015) suggested that  
98 neutral or even slightly costly maternally transmitted symbionts could spread in the host population by  
99 chance association with another symbiont that is beneficial to the host. Faithful maternal transmission  
100 would maintain the association between the two symbionts even if it were advantageous for the host to  
101 lose one. This symbiont hitchhiking is analogous to the genetic hitchhiking (or draft), where a neutral  
102 or slightly deleterious mutation spreads in the population because of its linkage disequilibrium with a  
103 beneficial mutation (Felsenstein 1974). This symbiont hitchhiking might be responsible for the  
104 evolutionary maintenance of the symbiont called *X-type*, which is costly to its host, has not been found  
105 to provide any counterbalancing benefit, but is positively associated with the defensive symbiont *H.*  
106 *defensa* (Doremus & Oliver 2017).

107 Jaenike (2012) argued that because most symbionts show some degree of maternal transmission  
108 failure, associations due to symbiont hitchhiking should disappear rapidly. Thus, in most cases, the  
109 presence of positive (or negative) associations between symbionts suggests an interaction that favors  
110 (or hinders) their co-occurrence. Jaenike *et al.* (2010) showed that *Spiroplasma* and *Wolbachia* in  
111 *Drosophila neotestacea* are positively associated despite imperfect maternal transmission. By  
112 combining these observations with a mathematical model, they suggested that these two symbionts are  
113 likely to be interacting positively with each other. As we will show in this paper, positive and negative  
114 associations are also expected to appear and persist by drift, implying that without information about  
115 the effective female population size, one needs to be cautious in assigning biological meaning to such  
116 associations.

117 In the first part of this study, we used a field survey of *A. pisum* symbiotic infections to identify  
118 positive and negative associations among symbionts. We report some new associations and confirm  
119 some already known associations. We also show that there are three sub-clades of *Spiroplasma* in pea  
120 aphids, which tend to be associated with very different symbiont communities. In the second part of  
121 this study, we developed a simulation model of maternally and horizontally transmitted symbiont  
122 communities in female host populations of finite size. We used this model to assess the effect of drift

123 on the tendency of symbionts to be randomly assorted to each other or not, thus aiding our  
124 interpretation of observed associations in the field. We also applied the model to the association  
125 between *Spiroplasma* and *Wolbachia* in *D. neotestacea* described by Jaenike *et al.* (2010) as a useful  
126 test case, and, under a reasonable assumption for its effective population size, we come to the  
127 conclusion that this association is indeed likely to reflect a positive interaction between symbionts.

## 128 **Materials and Methods**

129

130 Natural symbiont co-occurrence

### 131 **Field sampling and symbiont screening**

132

133 We sampled 498 aphids in France, Switzerland, Germany and Denmark during autumn 2014 and  
134 spring and summer 2015. We selected colonies that were at least 2 meters apart from each other to  
135 limit the risk of sampling offspring of the same mother. For each sample, we recorded the host plant  
136 and the GPS coordinates. We characterised the presence of seven known facultative endosymbionts by  
137 diagnostic PCR using symbiont-specific primers to amplify a part of the 16S rRNA gene (Table S1).  
138 DNA was extracted from individual aphids using the ‘salting out’ protocol (Sunnucks & Hales 1996)  
139 and the PCR cycling conditions are described by Henry *et al.* (2013). We also ran a diagnostic PCR for  
140 the obligate endosymbiont *Buchnera aphidicola*, which is present in all aphids and thus served as an  
141 internal positive control for the quality of the DNA preparation. Only samples testing positive for *B.*  
142 *aphidicola* were included in the final dataset.

### 143 **Phylogeny of *Spiroplasma* in pea aphids**

144

145 Because we had a special interest in *Spiroplasma* infecting pea aphids (Mathé-Hubert *et al.* in  
146 prep.), we also analysed the distribution of intraspecific diversity in this symbiont. This analysis  
147 included the 26 strains found in the above-mentioned field sampling as well as 11 strains that were  
148 kindly provided by Ailsa McLean (Department of Zoology, University of Oxford, UK; Table S2). The  
149 diversity of *Spiroplasma* was characterised using a phylogeny based on the *dnaA* gene and the  
150 *rpoB* gene, including its surrounding regions (445 pb and 2731 pb, respectively, including primers;

151 Table S1). The PCR cycling conditions are as described by Henry *et al.* (2013), except that the  
152 elongation time of the primer pair RpoBF1.ixod was doubled (Table S1). We deposited all dnaA and  
153 rpoB sequences in Genbank (accession numbers: MG288511 to MG288588).

154 We inferred the phylogenetic tree of the 37 *Spiroplasma* strains using *Spiroplasma sp.* in *Ostrinia*  
155 *zaguliaevi* as outgroup, which is the most closely related species to *Spiroplasma* of the pea aphid for  
156 which we could obtain sequences for both the rpoB and dnaA genes. The substitution model “GTR +  
157 gamma + invariant sites” was identified by AICc (“phangorn” R package v 2.2.0, Schliep 2011) as the  
158 best-fitting for the MAFFT-aligned and then concatenated dnaA and rpoB sequences. It was used to  
159 build a maximum likelihood tree with the software MEGA6 (Tamura *et al.* 2013). This analysis  
160 identified three main clades of *Spiroplasma* from pea aphids that are later referred to as clade 1, 2 and  
161 3.

## 162 Statistical analysis

163  
164 All analyses were performed using the R software (version 3.4.4; R Core Team 2018). To detect  
165 associations of symbionts that are more or less abundant than expected under random assortment while  
166 accounting for spatiotemporal non-independence among samples we predicted the presence or absence  
167 of each symbiont species with a regression random forest model (RF). In each RF, the following  
168 explanatory variables were used: latitude, longitude, season (number of days since the start of the  
169 year), host plant on which the aphid has been sampled, aphid colour (pink or green), presence or  
170 absence of the six other symbionts (one variable per symbiont) and the total number of other symbiont  
171 species infecting the aphid.

172 In order to handle the multicollinearity as accurately as possible, RFs were grown with conditional  
173 inference trees and the effect of variables estimated with conditional importance (package *party*;  
174 Hothorn *et al.* 2006). Our methodology mostly follows the advice of Jones and Linder (2015). The  
175 only difference is that we applied the permutation approach developed by Hapfelmeier & Ulm (2013)  
176 to the conditional importance of explanatory variables to estimate their *p*-values that were then

177 adjusted to keep the false discovery rate at 5% (Benjamini & Yekutieli 2001). With this approach,  
178 there is one model per symbiont, the presence or absence of the focal symbiont being explained by the  
179 presence or absence of the six other symbionts. Thus each pair of symbiont (a and b) is considered by  
180 two models, one explaining the symbiont a and the other explaining the symbiont b. This approach  
181 thus leads to two  $p$ -values per couple of symbionts. To facilitate the interpretations of the results, we  
182 repeated this analysis by restricting the dataset to aphids sampled on *Medicago sativa* and to aphids  
183 sampled on *Trifolium spp.*, which represent 30 and 33% of all field samples, respectively. This  
184 restriction avoids lumping together aphids from multiple host races and thus simplifies the  
185 interpretation. We refer hereafter to these three types of models as RF<sub>WD</sub> (whole dataset), RF<sub>M</sub> (*M.*  
186 *sativa*) and RF<sub>T</sub> (*Trifolium spp.*). For RF<sub>M</sub> and RF<sub>T</sub> the host plant was removed from the set of  
187 explanatory variables.

188 These analyses revealed that some symbionts are less frequent in aphids already containing other  
189 symbiont species, while others are not significantly affected by the presence of other symbionts. To  
190 further investigate this, we tested if there was a link between the frequency of each symbiont species  
191 and the average number of additional symbiont species with which it co-occurs. Such a link is  
192 expected to occur even in the absence of interaction between symbionts, because under occasional  
193 horizontal transmission, common symbionts are more likely to become associated with their own kind  
194 than rare symbionts. We used a Wald test (function *regTermTest* of the package *survey*; Lumley &  
195 Scott 2014) to test if the observed slope of the relationship between symbiont frequency and the mean  
196 number of co-infecting symbionts was different from the slope expected under the null assumption of  
197 no interaction between symbionts. The formula used to compute the expected slope is provided in  
198 Appendix S1.

199 To investigate the intraspecific distribution of *Spiroplasma*, we used a classification RF to predict  
200 the phylogenetic clade of *Spiroplasma* for each *Spiroplasma* infected aphid. The *Spiroplasma* strain  
201 S362 was excluded from the analysis because it was not assignable to one of the three phylogenetic  
202 clades. The variables were the same as in the previous analysis except that the aphid colour was not



203 available for all aphids and was thus not used. For significant variables, we compare clades to each  
204 other in a pairwise fashion to characterise inter-clade differences. Since some of these significant  
205 variables are continuous and some are categorical, we used Wilcoxon or Fisher's exact tests,  
206 respectively to perform these pairwise comparisons.

## 207 [Simulations of the symbiont co-occurrences](#)

208  
209 We investigated the effect of drift on deviations from random assortment of symbionts by  
210 simulating populations of hosts with two species of maternally transmitted symbionts. In short, we  
211 simulated populations of female hosts reproducing with non-overlapping generations, and being  
212 infected by zero, one or two symbionts species (or strains). Symbionts are maternally transmitted with  
213 a varying degree of efficiency and they are also horizontally transmitted at varying rates. Specifically,  
214 we simulated 3000 replicates of all combinations of the following sets of parameters: Effective female  
215 population sizes ( $N_eF$ :  $10^3$ ,  $10^4$ ,  $10^5$ ,  $10^6$ , and  $10^7$ ), Successful maternal transmission rates ( $M_T$ : 1,  
216 0.999, 0.99, 0.90), Horizontal transmission rates (i.e.: Average number of horizontal transmission  
217 events caused by each infected host;  $H_T$ : 0, 0.001, 0.01, 0.1).

218 To initiate the populations we first randomly chose the frequencies of the two symbiont species  
219 from a uniform distribution and computed the frequency of the four kinds of symbiont communities  
220 (no symbiont, symbiont 1, symbiont 2, symbionts 1 and 2) according to the assumption of random  
221 assortment and the frequencies of the symbionts. Then, the population sizes of the four kinds of  
222 communities were sampled in a multinomial distribution, according to the previously computed  
223 probabilities.

224 Population evolution was simulated for  $10^5$  generations or stopped if the polymorphism of infection  
225 was lost. In the absence of selection, for most combinations of  $M_T$  and  $H_T$ , the symbionts get rapidly  
226 fixed or lost which prevents assessing deviations from random assortment. To limit this loss of  
227 polymorphism, we have set the direction and the strength of the selection on the presence of each  
228 symbiont in a way that the expected equilibrium frequency of each symbiont equals their initial

229 frequency. For more detail, see Appendix S2. This procedure was more efficient at delaying the loss of  
230 polymorphism due to the maternal transmission failure, than the loss due to horizontal transmissions.  
231 This is because the amount of horizontal transmissions has a positive feedback on itself, while the  
232 amount of vertical transmission failure has a negative feedback on itself (Appendix S2).

233 At each generation, 500 individuals were randomly sampled from the population and used to test  
234 the significance of the deviation from the assumption of random assortment using a  $\chi^2$ -test (Yates  
235 1934) and to assess the sign of the deviation. The  $p$ -values are recorded at generations 0, 10,  $10^2$ ,  $10^3$ ,  
236  $10^4$  and  $10^5$ . We also assessed if, as it is often assumed, associations lasting for several years are  
237 unlikely driven by drift. We estimated the number of generations needed for a previously significantly  
238 positive association to become significantly negative. This was computed for each replicate as the  
239 number of simulated generations divided by the number of inversion of the sign of significant trends.  
240 The detailed description of the model and the model itself are in Appendix S2.

241 Jaenike *et al.* (2010) argued that *Wolbachia* and *Spiroplasma* in *D. neotestacea* are probably  
242 interacting in a way that enhances the fitness of co-infected hosts because they are positively  
243 associated in natural populations, despite having a maternal transmission rate of around 0.96, which  
244 should rapidly randomise them. We used our model to assess how robust this conclusion is to drift. We  
245 simulated, as described above, populations of female hosts infected by up to two symbionts with initial  
246 frequencies of 0.8135 and 0.4289, which are the mean frequencies of infection with *Wolbachia* and  
247 *Spiroplasma* in *D. neotestacea* measured by Jaenike *et al.* (2010). In this simulation, we set the  
248 maternal transmission rate to 0.96, which is the mean of the estimates obtained by Jaenike *et al.* (2010)  
249 for both *Wolbachia* and *Spiroplasma*.

## 250 Results

### 251 Natural co-occurrence of pea aphid symbionts

252 The RFs analysing the associations of symbionts in all field-sampled aphids revealed three positive  
253 associations and six negative associations. Of these associations, all were detected in RF<sub>WD</sub> (Fig. 1A)

254 six were detected in RF<sub>T</sub> (Fig. 1B), and only two were detected in RF<sub>M</sub> (Fig. 1C). The lower number of  
255 significant associations in *M. sativa* (RF<sub>M</sub>) than in *Trifolium spp.* (RF<sub>M</sub>) is unlikely due to a lower  
256 statistical power since the sample sizes and the average number of symbionts per aphid were similar in  
257 these two groups (*M. sativa*: 148 aphids with 0.97 symbionts per aphid on average; *Trifolium*: 161,  
258 0.77). Of the 11 significant associations already identified by other studies on pea aphids, six were also  
259 found in this study, and all associations reported by several studies (including ours) were always of the  
260 same sign (Table 1).

261 Some symbiont prevalences co-varied negatively with the total number of co-infecting symbiont  
262 species, whatever their identity (*H. defensa*: FDR-adjusted *p*-values:  $P=0.002$  and  $P=0.02$  in RF<sub>WD</sub>  
263 and RF<sub>M</sub>, respectively; *R. insecticola*:  $P<0.001$  in the three models RF<sub>WD</sub>, RF<sub>T</sub> and RF<sub>M</sub>; *S. symbiotica*:  
264  $P<0.001$  and in both RF<sub>WD</sub> and RF<sub>M</sub>). For pea aphids from *Trifolium spp.*, the relationship between  
265 symbiont prevalence and the mean number of co-infecting symbionts was tight ( $R^2=0.98$ ) and its slope  
266 was more negative than the expected slope under the assumption of no interactions among symbionts  
267 (Wald test:  $P<0.001$ , Fig. 2B), but this was mostly driven by *R. insecticola*. However, repeating the  
268 analysis without aphids infected by *R. insecticola* also yielded significantly different slopes ( $P=0.04$ ;  
269  $R^2=0.88$ ), mainly because *Rickettsiella* and *Rickettsia*, had a low frequency and tended to occur in  
270 aphids already infected by more than one other symbiont species (Fig. 2C). For pea aphids from *M.*  
271 *sativa*, the slope was also more negative than expected, but the difference was not significant ( $P=0.45$ ,  
272 Fig. 2A).

273 All these models included the variables longitude, latitude, season and in the case of RF<sub>WD</sub>, the host  
274 plant, to account for the non-independence between samples. However, these variables are highly  
275 correlated, and although we used conditional inference trees and conditional importance, the results  
276 should be interpreted with caution. The effects of these four variables on the frequency of each  
277 symbiont are described in Figure S1.

## 278 *Spiroplasma* intraspecific diversity

279

280 The pairwise comparison of sequences from *Spiroplasma* of pea aphids revealed that on  
281 average 0.63% of sites were different (max divergence=1.2%) which corresponds to 38% of the  
282 mean divergence between *Spiroplasma* of pea aphids and *Spiroplasma* of the moth *Ostrinia*  
283 *zaguliaevi* (1.6% of sites being divergent). The phylogenetic tree suggests that in Europe,  
284 *Spiroplasma* of the pea aphid is sub-divided into at least three clades, but clade 3 in particular has a  
285 low bootstrap support (Fig. 3). The relative frequencies of these three clades did not depend on the  
286 host plant (non-FDR-adjusted  $P=0.98$ ; Fig. 3) but were strongly dependent on the symbiont  
287 community. Clade 2 was more frequent in aphids already infected by other endosymbionts (FDR-  
288 adjusted  $P=0.01$ ) than the other two clades. This was marginally non-significant when comparing it to  
289 clade 1 and marginally significant when comparing it to clade 3 ( $P=0.06$  and  $P=0.03$ , respectively;  
290 Wilcoxon-test). The *Spiroplasma* clades were also differently associated with *H. defensa*, *X-type* and  
291 *Rickettsia* (FDR-adjusted  $P=0.02$ , 0.003 and 0.003, respectively). Specifically, clade 3 co-occurs less  
292 frequently with *H. defensa* than clades 1 and 2 ( $P=0.02$  and 0.01; Fisher-exact test) and more  
293 frequently with *X-type* than clades 1 and 2 ( $P=0.003$  and 0.006; Fisher-exact test; Fig. 1 and 3). Also,  
294 clade 2 is more frequently associated with *Rickettsia* than clades 1 and 3 ( $P<0.001$  and  $<0.001$ ; Fisher-  
295 exact tests; Fig. 1 and 3).

## 296 Simulations of the symbiont co-occurrences evolving by drift

297 Symbiont associations that are more or less frequent than expected under the hypothesis of random  
298 assortment are generally interpreted as a sign that an interaction between the symbionts promotes or  
299 prevents their co-occurrence. Our simulations showed that for symbionts with perfect maternal and no  
300 horizontal transmission, drift always leads to strong deviations from random assortment (Fig. 4). Such  
301 deviations take a longer time to appear in large populations where drift is weak. Also, the median  
302 number of generations between the appearance of a significant deviation from random assortment of a  
303 given sign and the inversion of the sign is 54, 117, and 211, respectively, for effective female  
304 population sizes of  $10^3$ ,  $10^4$  and  $10^5$  or more (Fig. S4). As often presumed, less-than-perfect maternal  
305 transmission and horizontal transmissions tend to randomize symbiont associations (Fig. 4 and S3).

306 However, our model shows that this effect can be offset by drift. Thus, whether random assortment is a  
307 valid expectation for non-interacting symbionts will depend on the effective female population size as  
308 well as on the rates of horizontal transmissions and maternal transmission failures (Fig. 4 and S3).  
309 Horizontal transmission and maternal transmission failure are also shortening the mean number of  
310 generations between inversions of the sign of deviations from random assortment (Fig S3). In case of a  
311 maternal transmission rate of 0.9, and a horizontal transmission rate of 0.1, the median number of  
312 generations is 38, 50, and 52, respectively, for effective female population sizes of  $10^3$ ,  $10^4$  and  $10^5$  or  
313 more.

314 Our simulations suggest that the observations reported by Jaenike *et al.* (2010) would be  
315 compatible with drift if the effective female population size of *D. neotestacea* would be  $10^3$ , but not if  
316 it would be  $10^4$  or more. Indeed, for the symbiont frequency and maternal transmission rate reported  
317 by Jaenike *et al.* (2010) and a female population size of  $10^3$ , the type 1 error rate of a test of  
318 independence of symbiont occurrence is 14%, while it is around 5% for female population size of  $10^4$   
319 or more (Fig. S4). Our simulations also suggest that on average, the sign of deviations from random  
320 assortment that are driven by drift would only happen every 34, 48, and 52 generations, respectively,  
321 for female populations size of  $10^3$ ,  $10^4$ , and  $\geq 10^5$  (Fig. S4).

## 322 Discussion

323 Understanding how symbionts associate and interact within a host is important but challenging.  
324 Laboratory experiments address this question by controlling all relevant parameters and observing the  
325 outcomes, but they can only accommodate a tiny portion of the natural diversity of each interacting  
326 species. In addition, such studies have often found that the outcome depends on the genotypes of the  
327 interacting partners (e.g.: Russell & Moran 2006; Oliver *et al.* 2009; Vorburger & Goukov 2011;  
328 Hansen *et al.* 2012; Lukasik *et al.* 2013; Weldon *et al.* 2013; Niepoth *et al.* 2018), further complicating  
329 predictions about these interactions in natural populations. Comparisons with field observations are  
330 therefore essential. When analysing field surveys, interactions between symbionts are tentatively

331 inferred by comparing the observed frequency of co-occurrences to the frequency expected under the  
332 hypothesis of random assortment. Departures from random assortment have been reported frequently  
333 (e.g., Ferrari *et al.* 2012; Henry *et al.* 2013 in addition to the above-mentioned studies). Of the 21  
334 possible pairwise associations among the seven facultative endosymbionts considered here, 11 have  
335 already been reported to have significantly higher or lower frequencies than expected under random  
336 assortment in earlier studies on pea aphids (Table 1). Six of these associations were also found in our  
337 field sampling, and three are reported for the first time. When focusing on *Spiroplasma*, we even  
338 found significant associations at the intra-specific level. The three main *Spiroplasma* clades identified  
339 in the phylogenetic tree were non-randomly associated with other symbionts, independent of the host  
340 plants the aphids were collected from. Such intraspecific variation in a symbiont-symbiont association  
341 has also been reported between *X-type* and *H. defensa* in the pea aphid (Doremus & Oliver 2017). But  
342 what is the biological meaning of these associations?

#### 343 **Drift induces deviations from random assortment**

344 Our simulation model showed that random drift also induces associations among maternally  
345 transmitted symbionts, suggesting that random assortment is not an appropriate null model to compare  
346 symbiont co-infections against. The reason for that is most easily understood by considering the  
347 coalescence framework. Statistical tests used to detect departures from random assortment assume that  
348 samples are independent of each other. While this may apply to horizontally transmitted symbionts, it  
349 will not apply to maternally transmitted symbionts. Some individuals will have the same symbiont  
350 simply because they share a female ancestor that transmitted this particular symbiont community to all  
351 of its offspring. In population genetics, this phenomenon is referred to as the coalescence (Balding *et al.*  
352 *et al.* 2007; which should not be confounded with the ‘community coalescence’; Rillig *et al.* 2015). One  
353 of the measures of the strength of drift is the expected coalescent time, the average number of  
354 generations between two randomly sampled alleles and their most recent common ancestor. It is equal  
355 to  $2N_e$  for diploid autosomal genes, but it is only  $N_e/2$  for maternally transmitted cytoplasmic genomes  
356 (assuming a sex-ratio of 0.5). This is because only females do transmit the cytoplasmic genome, and

357 they have only one copy of it (Moore 1995; Jaenike 2012). Cytoplasmic genomes, including  
358 endosymbionts, hence undergo four times more drift than nuclear autosomal genes.

359 Jaenike (2012) investigated how the population genetics framework can be adapted and used to  
360 study the evolution of communities of maternally transmitted symbionts by comparing each symbiont  
361 to a gene. However, given the generally high fidelity of maternal transmission and the low rate of  
362 horizontal transmission of endosymbionts, one could also compare the whole symbiont community to  
363 one gene with many alleles. Assuming no mutational bias, mutations increase allelic diversity and  
364 maintain the alleles at a similar frequency, while, drift has the opposite effect. This mutation-drift  
365 balance is largely analogous to the balance between maternal transmission failures, horizontal  
366 transmissions and drift that we studied with our model. The main difference is that while maternal  
367 transmission failure effectively acts as a directional mutation pressure, where the number of  
368 individuals mutating from one state (infected) to the other (uninfected) is proportional to the number  
369 of individual in the original state (infected), this is not true for horizontal transmission. The probability  
370 of undergoing a horizontal transmission increases with the frequency of the symbiont, which makes  
371 polymorphism less easily maintained in the presence of horizontal transmission.

372 Drift-induced deviations from random assortment can persist for a very long time. In a population  
373 of diploid autosomal genes, a neutral mutation that reaches fixation does so, on average,  $4N_e$   
374 generations after it appeared (Kimura & Ohta 1969), or after  $N_e$  generations in a haploid, maternally  
375 transmitted gene. Thus, we should expect that drift-induced deviations from random assortment of  
376 symbionts should also be somewhat stable in time. In agreement with that, our simulations of two  
377 strictly maternally transmitted symbionts show that drift-induced inversions of the sign of significant  
378 deviations from random assortment occur every 50 to 200 generations on average, depending on the  
379 effective female population size. These numbers should not be used as a general reference because  
380 significance depends on the size of the samples used to assess deviations from random assortment (500  
381 hosts in our simulations). Departures from random assortment became less stable in presence of  
382 horizontal transmissions and maternal transmission failures.



383 [The association between \*Wolbachia\* and \*Spiroplasma\* in \*Drosophila neotestacea\* as a](#)  
384 [test case](#)

385 Jaenike *et al.* (2010) studied the maintenance of the positive association between *Wolbachia* and  
386 *Spiroplasma* in *D. neotestacea*. They used a mathematical model to show that given the maternal  
387 transmission rate estimated at 0.96, the association should disappear very rapidly in the absence of any  
388 positive interactions between the two symbionts. While it is true that this relatively imperfect maternal  
389 transmission will push a population towards random assortment, their model only considered the  
390 frequency of the symbionts. Thus, it implicitly assumed an infinite population size and omitted drift  
391 which, as we have shown, will push populations towards non-random assortment. Using our model  
392 with the same parameter estimates, we show that a significant association between two symbionts  
393 could be induced just by drift if the effective female population size of *D. neotestacea* were in the  
394 range of  $10^3$ , but not if it were in the range of  $10^4$  or larger. The effective population size of *D.*  
395 *neotestacea* is not known, but the effective population size of North American *D. melanogaster* has  
396 been estimated to be between 3 to  $5 \times 10^6$  (Garud *et al.* 2015). Unless the population structure of *D.*  
397 *neotestacea* is radically different from *D. melanogaster*, we can reasonably assume that its effective  
398 population size is higher than  $10^4$ . Therefore, a stronger mechanism than drift appears to be  
399 responsible for maintaining the positive association between *Wolbachia* and *Spiroplasma* in *D.*  
400 *neotestacea*, corroborating the conclusion of Jaenike *et al.* (2010) that positive selection acts on the  
401 combination of these two endosymbionts.

402 [Symbiont associations in pea aphids – selection or drift?](#)

403 After emphasizing the importance of considering drift as a source of non-random assortment  
404 among symbionts, we return to the interpretation of positive and negative associations among  
405 facultative endosymbionts observed in pea aphids. Are they maintained by interactions among  
406 symbionts or just a consequence of drift? Good estimates of effective female population size would  
407 obviously help. Unfortunately, this is a tricky problem in aphids and other cyclical parthenogens.  
408 Although aphids can reach enormous population sizes, they undergo a bottleneck each winter, and



409 clonal selection during the asexual phase of the life cycle (approx. 7-14 generations in pea aphids;  
410 Barker 2016) can be intense (e.g., Vorburger 2006), which will also reduce the effective population  
411 size. This clonal selection acts on the three components of genetic variance (additive, epistatic and of  
412 dominance), but the optimisation it induces on the non-additive variances is lost at each sexual  
413 generation, which maintains the presence of clonal selection from year to year (Lynch & Deng 1994).  
414 On the other hand, aphids are good dispersers and exhibit shallow genetic population structure over  
415 large geographic scales. For example, Ferrari *et al.* (2012) reported  $F_{ST}$ -values ranging from 0.03 to  
416 0.11 for pea aphid populations from the same host plants across different European countries, and Via  
417 & West (2008) reported a mean  $F_{ST}$  of 0.03 for North American populations of the pea aphid. Such  
418 high population connectivity should have a positive effect on effective population size. We do not  
419 know the effective population size of pea aphids, but DNA sequence-based estimates from other  
420 cyclical parthenogens, waterfleas of the genus *Daphnia*, are rather high (300'000 – 600'000; Haag *et*  
421 *al.* 2009). If estimates were similarly high for pea aphids, the importance of drift in generating non-  
422 random assortment of symbionts would be limited (Fig. 4).

423 Another important aspect to consider is the consistency of the sign of significant associations.  
424 While drift will generate associations of random and (slowly) fluctuating sign, selection is expected to  
425 consistently favour either positive or negative associations between particular pairs of facultative  
426 endosymbionts. For significant associations that were discovered in multiple studies, the sign of the  
427 association was always the same (Table 1). Finding particular combinations of symbionts consistently  
428 over- or underrepresented across different times and places suggests they are not caused by drift. For  
429 example, the European pea aphids population is thought to have colonised North America at least 200  
430 years ago, which would represent 1600 to 3000 pea aphid generations, and there is strong genetic  
431 differentiation among pea aphids from the two continents today (Brisson *et al.* 2009). Despite this  
432 separation, the four associations that have been reported in both continents are of the same sign.  
433 However, any of these associations observed one time on each of the two continents are only two  
434 independent observations of a kind of event that may also happen by drift.

435 In addition to testing for deviations from random assortment, some studies have also assessed  
436 whether symbiont species tend to be differently associated with aphids that are already infected with 0,  
437 1, 2 or more other symbiont species (e.g., Ferrari *et al.* 2012; Russell *et al.* 2013; Zchori-Fein *et al.*  
438 2014; Rock *et al.* 2017). As these analyses are assuming that all the sampled symbiont communities  
439 are independent, they are also affected by drift. In our field survey, we found that *H. defensa*, *S.*  
440 *symbiotica* and *R. insecticola* occurred more frequently in aphids containing no or few other symbiont  
441 species than expected under the assumption of random assortment, although this was only significant  
442 in aphids sampled from *M. sativa*. When further investigating this by characterising the link between  
443 the frequency of each symbiont species and the number of co-infecting symbiont species (see Figure  
444 2), we found that this link was non-significant absent in aphids sampled on *M. sativa*, and stronger  
445 than expected under the assumption of no symbiont interaction in aphids sampled on *Trifolium spp.* At  
446 least two non-exclusive mechanisms could have yielded such a pattern. Firstly, rare symbionts might  
447 be rare because they need the presence of other symbionts to persist in their host. Secondly, symbionts  
448 might have adapted to co-occurrence patterns that are largely a function of their relative frequencies,  
449 which entail that frequent symbionts should be less likely to share a host with other symbiont species  
450 than rare symbionts. Rare symbionts are thus more strongly selected for persistence in the presence of  
451 other symbiont species. This highlights that only abundant symbiont associations are efficiently  
452 optimised by natural selection. It is therefore worth considering that associations between symbionts  
453 that are currently maintained by a positive interaction may have evolved as a consequence of an  
454 association that had originally appeared by drift or draft.

455 Lastly, inference on the biology of particular symbionts or their associations can be strengthened  
456 from analyses of seasonal patterns and their comparison with expectations from laboratory  
457 experiments. In studies of seasonal dynamics, the effect of drift is ideally ruled out using  
458 spatiotemporal replication. For example, Smith *et al.* (2015) reported correlated change in the  
459 symbiont frequencies and the parasitoid-induced host mortality which, together with the laboratory  
460 evidence for symbiont-conferred resistance against parasitoids, suggested a causal relationship

461 between them. Also, Montllor *et al.* (2002) reported an increase of the frequency of *S. symbiotica*  
462 correlated with temperature, which was consistent with this symbiont helping to tolerate heat stress.  
463 Our sampling design was not suited for such inference, but the result that *H. defensa* was more  
464 abundant in summer than in spring (Fig. S1) was at least consistent with selection by parasitoids as  
465 also reported by Smith *et al.* (2015). Field observations are also informative when they do not match  
466 the expectations from laboratory work. For example, laboratory experiments suggested that *X-Type*  
467 does not provide any detectable benefit to the pea aphid, but it is quite frequent and positively  
468 associated to *H. defensa*, suggesting it might have benefited from hitchhiking during the spread of *H.*  
469 *defensa* (Doremus & Oliver 2017). Also, Wulff *et al.* (2013) did not find that the symbiont  
470 *Arsenophonus* was protecting its *Aphis glycines* host against its main parasites, but it was present at  
471 high frequency. This discrepancy between observation and expectation motivated further experiments  
472 revealing that *Arsenophonus* provides a general – yet to be described – benefit to the aphid (Wulff &  
473 White 2015). Although difficult to interpret, field surveys remain crucial for our understanding of the  
474 ecology of symbioses.

## 475 Conclusion

476 The fate of holobionts depends on host-symbiont interactions as well as on symbiont-symbiont  
477 interactions, but identifying them is not always straightforward. The approach consisting in analysing  
478 the frequency of associations in the field is useful. However, the results it yields must be interpreted  
479 carefully, in particular in the case of maternally transmitted symbionts, as patterns expected to be  
480 produced by interactions between symbionts are also induced by drift. This highlights the need for  
481 translating the biological null hypothesis into a valid statistical null hypothesis. Failure to do so may  
482 result in biological misinterpretations of survey results.

## 483 Acknowledgements

484 We are very grateful to Paula Rodriguez for her help with insect rearing and to Marco Thali and Joelle  
485 Schmid for assistance with the molecular analyses of the field samples. We also thank Ailsa McLean

486 for sharing several *Spiroplasma*-infected aphid lines. This work was supported by a Sinergia grant  
487 from the Swiss National Science Foundation (grant nr. CRSII3\_154396 to CV).

## 488 References

- 489 Anbutsu H, Lemaitre B, Harumoto T, Fukatsu T (2016) Male-killing symbiont damages host's dosage-  
490 compensated sex chromosome to induce embryonic apoptosis. *Nature Communications*, **7**, 1–12.
- 491 Balding DJ, Bishop M, Cannings C (2007) Population Genetics. In: *Handbook of Statistical Genetics* ,  
492 pp. 753–780.
- 493 Ballinger MJ, Perlman SJ (2017) Generality of toxins in defensive symbiosis: Ribosome-inactivating  
494 proteins and defense against parasitic wasps in *Drosophila*. *PLoS pathogens*, **13**, e1006431.
- 495 Barker B (2016) Aphids in pulse crops. *Saskatchewan Pulse Growers*, 8–10.
- 496 Benjamini Y, Yekutieli D (2001) The control of the false discovery rate in multiple testing under  
497 dependency. *Annals of statistics*, **29**, 1165–1188.
- 498 Brisson JA, Nuzhdin S V, Stern DL (2009) Similar patterns of linkage disequilibrium and nucleotide  
499 diversity in native and introduced populations of the pea aphid, *Acyrtosiphon pisum*. *BMC*  
500 *Genetics*, **10**.
- 501 Brucker RM, Bordenstein SR (2012) Speciation by symbiosis. *Trends in Ecology and Evolution*, **27**,  
502 443–451.
- 503 Dedeine F, Vavre F, Fleury F, *et al.* (2001) Removing symbiotic *Wolbachia* bacteria specifically  
504 inhibits oogenesis in a parasitic wasp. *Proceedings of the National Academy of Sciences*, **98**,  
505 6247–52.
- 506 Doremus MR, Oliver KM (2017) Aphid heritable symbiont exploits defensive mutualism. *Applied and*  
507 *Environmental Microbiology*, **83**, 1–15.
- 508 Duron O, Bouchon D, Boutin S, *et al.* (2008) The diversity of reproductive parasites among  
509 arthropods: *Wolbachia* do not walk alone. *BMC Biology*, **6**, 27.
- 510 Faria VG, Martins NE, Paulo TF, *et al.* (2016) *Drosophila* adaptation to viral infection through  
511 defensive symbiont evolution. *PLoS genetics*, **12**, e1006297.
- 512 Felsenstein J (1974) The evolutionary advantage of recombination. *Genetics*, **78**, 737–756.
- 513 Ferrari J, West J a, Via S, Godfray HCJ (2012) Population genetic structure and secondary symbionts  
514 in host-associated populations of the pea aphid complex. *Evolution*, **66**, 375–390.
- 515 Frago E, Mala M, Weldegergis BT, *et al.* (2017) Symbionts protect aphids from parasitic wasps by  
516 attenuating herbivore-induced plant volatiles. *Nature Communications*, **8**, 1–9.
- 517 Garud NR, Messer PW, Buzbas EO, Petrov DA (2015) Recent selective sweeps in north american  
518 *Drosophila melanogaster* show signatures of soft sweeps. *PLoS Genetics*, **11**, e1005004.
- 519 Haag CR, McTaggart SJ, Didier A, Little TJ, Charlesworth D (2009) Nucleotide polymorphism and  
520 within-gene recombination in *Daphnia magna* and *D. pulex* , two cyclical parthenogens.  
521 *Genetics*, **182**, 313–323.
- 522 Hansen AK, Vorburger C, Moran N a. (2012) Genomic basis of endosymbiont-conferred protection  
523 against an insect parasitoid. *Genome Research*, **22**, 106–114.

- 524 Hapfelmeier A, Ulm K (2013) A new variable selection approach using random forests.  
525 *Computational Statistics and Data Analysis*, **60**, 50–69.
- 526 Hedges LM, Brownlie JC, O’Neill SL, Johnson KN (2008) Wolbachia and virus protection in insects.  
527 *Science*, **322**, 702.
- 528 Henry LM, Maiden MCJ, Ferrari J, Godfray HCJ (2015) Insect life history and the evolution of  
529 bacterial mutualism. *Ecology Letters*, **18**, 516–525.
- 530 Henry LM, Peccoud J, Simon JC, *et al.* (2013) Horizontally transmitted symbionts and host  
531 colonization of ecological niches. *Current Biology*, **23**, 1713–1717.
- 532 Hilgenboecker K, Hammerstein P, Schlattmann P, Telschow A, Werren JH (2008) How many species  
533 are infected with Wolbachia?-A statistical analysis of current data. *FEMS microbiology letters*,  
534 **281**, 215–20.
- 535 Hothorn T, Hornik K, Zeileis A (2006) Unbiased recursive partitioning: A conditional inference  
536 framework. *Journal of Computational and Graphical Statistics*, **15**, 651–674.
- 537 Jaenike J (2012) Population genetics of beneficial heritable symbionts. *Trends in Ecology and*  
538 *Evolution*, **27**, 226–232.
- 539 Jaenike J, Stahlhut JK, Boelio LM, Unckless RL (2010) Association between Wolbachia and  
540 Spiroplasma within Drosophila neotestacea: an emerging symbiotic mutualism ? *Molecular*  
541 *Ecology*, **19**, 414–425.
- 542 Kimura M, Ohta T (1969) The average number of generations until fixation of a mutant gene in a  
543 finite population. *Genetics*, **61**, 763–771.
- 544 Kremer N, Charif D, Henri H, *et al.* (2009) A new case of Wolbachia dependence in the genus  
545 Asobara: evidence for parthenogenesis induction in Asobara japonica. *Heredity*, **103**, 248–56.
- 546 Łukasik P, van Asch M, Guo H, Ferrari J, Charles J. Godfray H (2013) Unrelated facultative  
547 endosymbionts protect aphids against a fungal pathogen. *Ecology Letters*, **16**, 214–218.
- 548 Łukasik P, Guo H, Van Asch M, Ferrari J, Godfray HCJ (2013) Protection against a fungal pathogen  
549 conferred by the aphid facultative endosymbionts Rickettsia and Spiroplasma is expressed in  
550 multiple host genotypes and species and is not influenced by co-infection with another symbiont.  
551 *Journal of Evolutionary Biology*, **26**, 2654–2661.
- 552 Lumley T, Scott A (2014) Tests for regression models fitted to survey data. *Australian and New*  
553 *Zealand Journal of Statistics*, **56**, 1–14.
- 554 Lynch M, Deng H-W (1994) Genetic slippage in response to sex. *The American Naturalist*, **144**, 242–  
555 261.
- 556 Mathé-Hubert H, Kaech H, Ganesanandamoorthy P, Vorburger C (in prep.) Evolutionary costs and  
557 benefits of *Spiroplasma* infection in pea aphids.
- 558 Montllor CB, Maxmen A, Purcell AH (2002) Facultative bacterial endosymbionts benefit pea aphids  
559 Acyrthosiphon pisum under heat stress. *Ecological Entomology*, **27**, 189–195.
- 560 Moore WS (1995) Inferring phylogenies from mtDNA variation: mitochondrial-gene trees versus  
561 nuclear-gene trees. *Evolution*, **49**, 718–726.
- 562 Niepoth N, Ellers J, Henry LM (2018) Symbiont interactions with non-native hosts limit the formation  
563 of new symbioses. *BMC Evolutionary Biology*, **18**, 1–12.
- 564 Oliver KM, Degnan PH, Burke GR, Moran N a (2010) Facultative symbionts in aphids and the

- 565 horizontal transfer of ecologically important traits. *Annual review of entomology*, **55**, 247–266.
- 566 Oliver KM, Degnan PH, Hunter MS, Moran NA (2009) Bacteriophages encode factors required for  
567 protection in a symbiotic mutualism. *Science*, **325**, 992–994.
- 568 Oliver KM, Moran NA, Hunter MS (2006) Costs and benefits of a superinfection of facultative  
569 symbionts in aphids. *Proceedings of the Royal Society B*, **273**, 1273–1280.
- 570 Peccoud J, Ollivier A, Plantegenest M, Simon J-C (2009) A continuum of genetic divergence from  
571 sympatric host races to species in the pea aphid complex. *Proceedings of the National Academy  
572 of Sciences*, **106**, 7495–7500.
- 573 Queller DC, Strassmann JE (2016) Problems of multi-species organisms: endosymbionts to  
574 holobionts. *Biology & Philosophy*, **31**, 855–873.
- 575 Regassa LB (2014) The family Spiroplasmataceae. In: *The prokaryotes: Firmicutes and Tenericutes*  
576 (eds Rosenberg E, DeLong EF, Lory S, Stackebrandt E, Thompson F), pp. 551–567. Springer,  
577 Berlin, Heidelberg.
- 578 Rillig MC, Antonovics J, Caruso T, *et al.* (2015) Interchange of entire communities: microbial  
579 community coalescence. *Trends in Ecology & Evolution*, **30**, 470–476.
- 580 Rock DI, Wong N, Joffe J, *et al.* (2017) Context-dependent vertical transmission shapes strong  
581 endosymbiont community structure in the pea aphid, *Acyrtosiphon pisum*. *Molecular Ecology*,  
582 1–18.
- 583 Russell JA, Moran NA (2006) Costs and benefits of symbiont infection in aphids: variation among  
584 symbionts and across temperatures. *Proceedings of the Royal Society B*, **273**, 603–610.
- 585 Russell J a., Weldon S, Smith AH, *et al.* (2013) Uncovering symbiont-driven genetic diversity across  
586 North American pea aphids. *Molecular Ecology*, **22**, 2045–2059.
- 587 Sanada-Morimura S, Matsumura M, Noda H (2013) Male killing caused by a *Spiroplasma* symbiont in  
588 the small brown planthopper, *Laodelphax striatellus*. *Journal of Heredity*, **104**, 821–829.
- 589 Schliep KP (2011) phangorn: phylogenetic analysis in R. *Bioinformatics*, **27**, 592–593.
- 590 Simon JC, Boutin S, Tsuchida T, *et al.* (2011) Facultative symbiont infections affect aphid  
591 reproduction. *PLoS ONE*, **6**.
- 592 Smith AH, Piotr Ł, Connor MO, *et al.* (2015) Patterns, causes, and consequences of defensive  
593 microbiome dynamics across multiple scales. *Molecular Ecology*, **24**, 1135–1149.
- 594 Sunnucks P, Hales DF (1996) Numerous transposed sequences of mitochondrial cytochrome I-II in  
595 aphids of the genus *Sitobion* (Hemiptera: Aphididae). *Molecular Biology and Evolution*, **13**,  
596 510–524.
- 597 Tabata J, Hattori Y, Sakamoto H, *et al.* (2011) Male killing and incomplete inheritance of a novel  
598 *Spiroplasma* in the moth *Ostrinia zaguliaevi*. *Microbial Ecology*, **61**, 254–263.
- 599 Tamura K, Stecher G, Peterson D, Filipowski A, Kumar S (2013) MEGA6: Molecular evolutionary  
600 genetics analysis version 6.0. , **30**, 2725–2729.
- 601 Teixeira L, Ferreira A, Ashburner M (2008) The bacterial symbiont *Wolbachia* induces resistance to  
602 RNA viral infections in *Drosophila melanogaster*. *PLoS Biology*, **6**, e1000002.
- 603 Via S, West J (2008) The genetic mosaic suggests a new role for hitchhiking in ecological speciation.  
604 *Molecular Ecology*, **17**, 4334–4345.
- 605 Vorburger C (2006) Temporal dynamics of genotypic diversity reveal strong clonal selection in the



- 606 aphid *Myzus persicae*. *European Society for Evolutionary Biology*, **19**, 97–107.
- 607 Vorburger C (2018) Symbiont-conferred resistance to parasitoids in aphids – Challenges for biological  
608 control. *Biological Control*, **116**, 17–26.
- 609 Vorburger C, Gouskov A (2011) Only helpful when required: A longevity cost of harbouring  
610 defensive symbionts. *Journal of Evolutionary Biology*, **24**, 1611–1617.
- 611 Weldon SR, Strand MR, Oliver KM (2013) Phage loss and the breakdown of a defensive symbiosis in  
612 aphids. *Proceedings of the Royal Society B*, **280**, 20122103.
- 613 Werren JH, Baldo L, Clark ME (2008) Wolbachia: master manipulators of invertebrate biology.  
614 *Nature reviews. Microbiology*, **6**, 741–751.
- 615 Wulff JA, Buckman KA, Wu K, Heimpel GE, White JA (2013) The endosymbiont *Arsenophonus* is  
616 widespread in soybean aphid, *Aphis glycines*, but does not provide protection from parasitoids or  
617 a fungal pathogen. *PLoS ONE*, **8**, e62145.
- 618 Wulff JA, White JA (2015) The endosymbiont *Arsenophonus* provides a general benefit to soybean  
619 aphid (Hemiptera: Aphididae) regardless of host plant resistance (Rag). *Environmental*  
620 *Entomology*, **44**, 574–581.
- 621 Xie J, Butler S, Sanchez G, Mateos M (2014) Male killing *Spiroplasma* protects *Drosophila*  
622 *melanogaster* against two parasitoid wasps. *Heredity*, **112**, 399–408.
- 623 Yates F (1934) Contingency tables involving small numbers and the  $\chi^2$  test. *Supplement to the Journal*  
624 *of the Royal Statistical Society*, **1**, 217–235.
- 625 Zchori-Fein E, Lahav T, Freilich S (2014) Variations in the identity and complexity of endosymbiont  
626 combinations in whitefly hosts. *Frontiers in Microbiology*, **5**, 1–8.
- 627 Zchori-Fein E, Perlman SJ (2004) Distribution of the bacterial symbiont *Cardinium* in arthropods.  
628 *Molecular Ecology*, **13**, 2009–2016.
- 629 Zytynska SE, Weisser WW (2016) The natural occurrence of secondary bacterial symbionts in aphids.  
630 *Ecological Entomology*, **41**, 13–26.

631

## 632 Data Accessibility

633 The DNA sequences used in this study are available in Genbank (accession numbers: MG288511 to  
634 MG288588). The main dataset and the Appendices S1 and S2 containing additional results on the  
635 spatiotemporal distribution of the symbionts and the annotated code of the simulation model are  
636 deposited in the Dryad Digital Repository: DOI WILL FOLLOW WHEN ACCEPTED OR ASKED  
637 FOR BY EDITORS.

## 638 Author Contributions

639 HK, CH, CV and HMM performed the field sampling; HK, CH and HMM carried out the molecular  
640 analysis of the field samples; HMM was responsible for the data analysis and developed the model;  
641 HMM, HK, CH and CV wrote the paper.



642 **Tables**

643 **Table 1: Patterns of symbiont co-occurrence in this study and in other studies on pea**  
 644 **aphids**

645

|                              | RF <sub>WD</sub> | RF <sub>T</sub> | RF <sub>M</sub> | Oliver et<br><i>al.</i> 2006 | Rock et<br><i>al.</i> 2017 | Ferrari et<br><i>al.</i> 2012 | Russell et<br><i>al.</i> 2013 | Henry et<br><i>al.</i> 2013 |
|------------------------------|------------------|-----------------|-----------------|------------------------------|----------------------------|-------------------------------|-------------------------------|-----------------------------|
| Host plant                   | Many             | T               | M               | M                            | M                          | T                             | T V M                         | Many                        |
| Place                        | E.               | E.              | E.              | E.                           | N.A.                       | E. E.                         | N.A.                          | N.A.& E.<br>(14 countries)  |
| Regiella / Serratia          | –                | –               |                 |                              |                            |                               |                               |                             |
| Regiella / Spiroplasma       | –                | –               |                 |                              |                            |                               |                               |                             |
| Regiella / Rickettsia        | –                |                 |                 |                              | –                          |                               |                               |                             |
| Regiella / X-type            | –                | –               |                 |                              |                            | –                             |                               |                             |
| Regiella / Hamiltonella      | –                | –               | –               |                              |                            |                               | –                             |                             |
| Serratia / Rickettsia        |                  |                 |                 |                              |                            | +                             |                               |                             |
| Serratia / X-type            |                  |                 |                 |                              |                            | –                             |                               |                             |
| Serratia / Hamiltonella      | –                |                 |                 | –                            | –                          |                               |                               |                             |
| Serratia / Rickettsiella     |                  |                 |                 |                              | +                          |                               | +                             |                             |
| Spiroplasma / Rickettsia     | +                | +               |                 |                              |                            |                               |                               |                             |
| Spiroplasma / Hamiltonella   |                  |                 |                 |                              | –                          |                               |                               |                             |
| Rickettsia / Hamiltonella    | +                |                 |                 |                              | +                          |                               |                               |                             |
| X-type / Hamiltonella        | +                | +               | +               |                              | +                          |                               |                               | +                           |
| Hamiltonella / Rickettsiella |                  |                 |                 |                              | –                          |                               |                               |                             |

646 T: *Trifolium spp.*; M: *M. sativa*; V: *Vicia*; E: Europe; N.A.: North America

647

648 **Figures**

649 **Figure 1: Patterns of symbiont co-occurrence**

650 The seven symbiont species are represented by green boxes whose size is proportional to the  
 651 overall prevalence of the symbiont in the whole dataset (A; N=498), in aphids from *Trifolium spp.* (B;  
 652 N=161) and in aphids from *Medicago sativa* (C; N=148). Red and blue lines connect symbionts that  
 653 co-occur more or less often than expected under random assortment, respectively. Stars indicate the  
 654 FDR-adjusted level of significance of these associations and are placed close to the symbiont that was  
 655 the dependent variable in the random forest models.

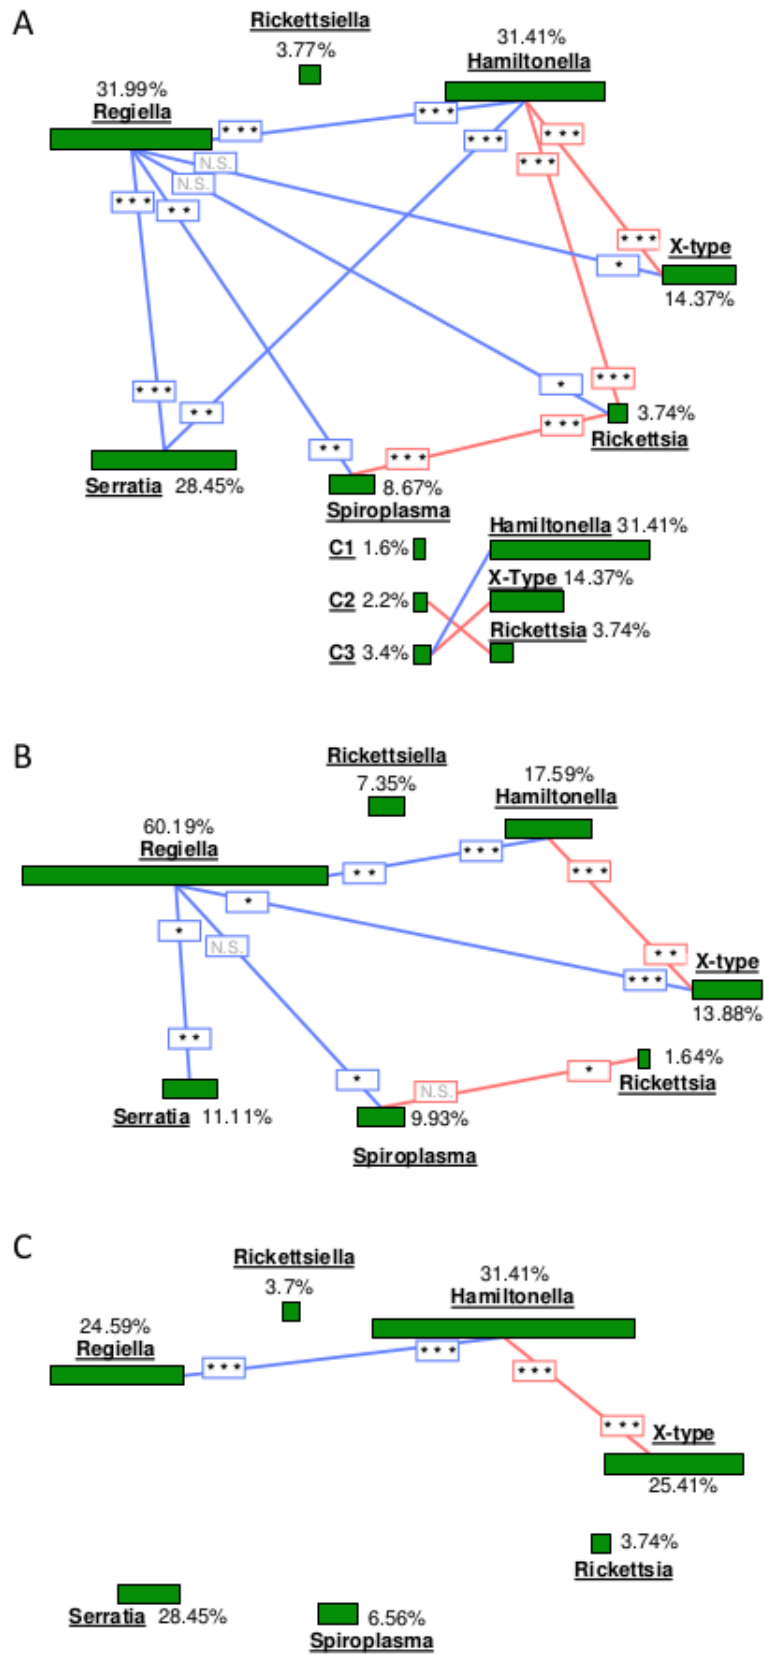

657 **Figure 2: Relationship between symbiont frequency and mean number of other**  
658 **symbionts species**

659 Comparison of the actual (black) and expected (grey) relationship between the frequency of  
660 endosymbionts species and the mean number of other symbiont species with which they co-occur.  
661 Each observed value is connected to its expected value by a dotted line. Stars along these lines indicate  
662 the level of significance detected by RF models. Analysis were performed on pea aphids from  
663 *Medicago sativa* (A) and *Trifolium spp.* (B). Panel C refers to the analysis performed on aphids from  
664 *Trifolium spp.*, but excluding individual infected with *Regiella insecticola* from the analysis. For each  
665 of these three cases, we tested if the angle between the two slopes ( $\alpha$ ) differed significantly from zero.

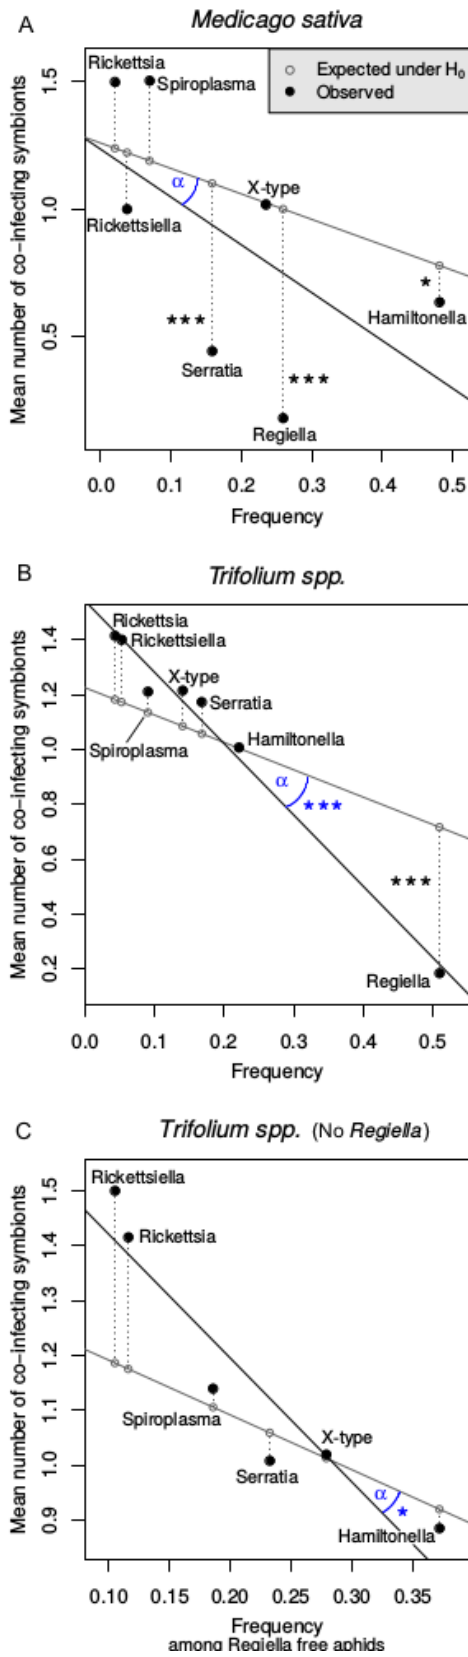

667 **Figure 3: Phylogenetic tree of *Spiroplasma* from pea aphids**  
 668 . Maximum likelihood phylogenetic tree of *Spiroplasma* strains from pea aphids, reconstructed  
 669 from concatenated rpoB and dnaA sequences and using *Spiroplasma* from *Ostrinia zaguliaevi* as  
 670 outgroup. Values in grey are the bootstrap support for the tree topology. The lists of the co-infecting  
 671 symbionts and the host plants are indicated on the right side of the strain name. Scale bar indicates the  
 672 substitution rate. The legend gives the abbreviations of the symbiont names, as well the FDR-adjusted  
 673 level of significance of these variables in the RF predicting the clade of each *Spiroplasma* strain (1, 2  
 674 or 3).

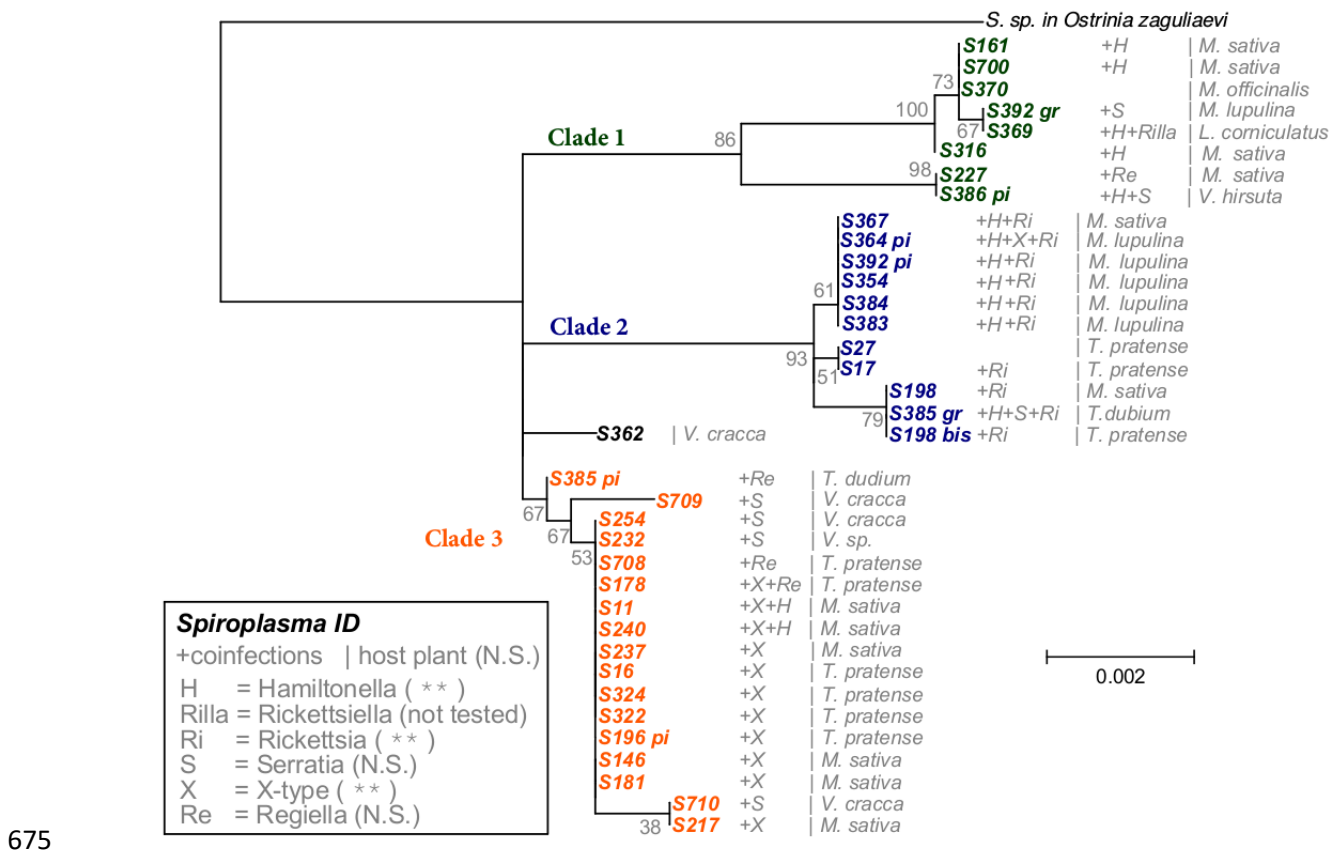

676 **Figure 4: Deviations from random assortment induced by drift**  
 677 The frequency of two maternally transmitted symbionts evolved for up to  $10^5$  generations, starting  
 678 from a population in which symbionts were randomly assorted. Boxplots show the  $p$ -values of  $\chi^2$ -tests  
 679 assessing the deviations random assortment at generations 0,  $10$ ,  $10^2$ ,  $10^3$ ,  $10^4$  and  $10^5$ . Each set of  
 680 boxplots corresponds to 3000 populations evolving with the combination of the parameters indicated  
 681 aside: ‘female population size’ (columns), ‘horizontal transmission rate’ ( $H_T$ ; rows) and ‘maternal

682 transmission rate' ( $M_T$ ; rows). The green horizontal line shows the 0.05 threshold, and the orange  
 683 squares and lines indicate the type 1 error rate. Analyses of field surveys testing for deviation from  
 684 random assortment usually assume that the type 1 error rate is 0.05. Combinations of parameters  
 685 where this is not the case have a yellowish background. The numbers above the boxplots indicate the  
 686 proportion of populations that still retained some polymorphism of infection by both symbionts.

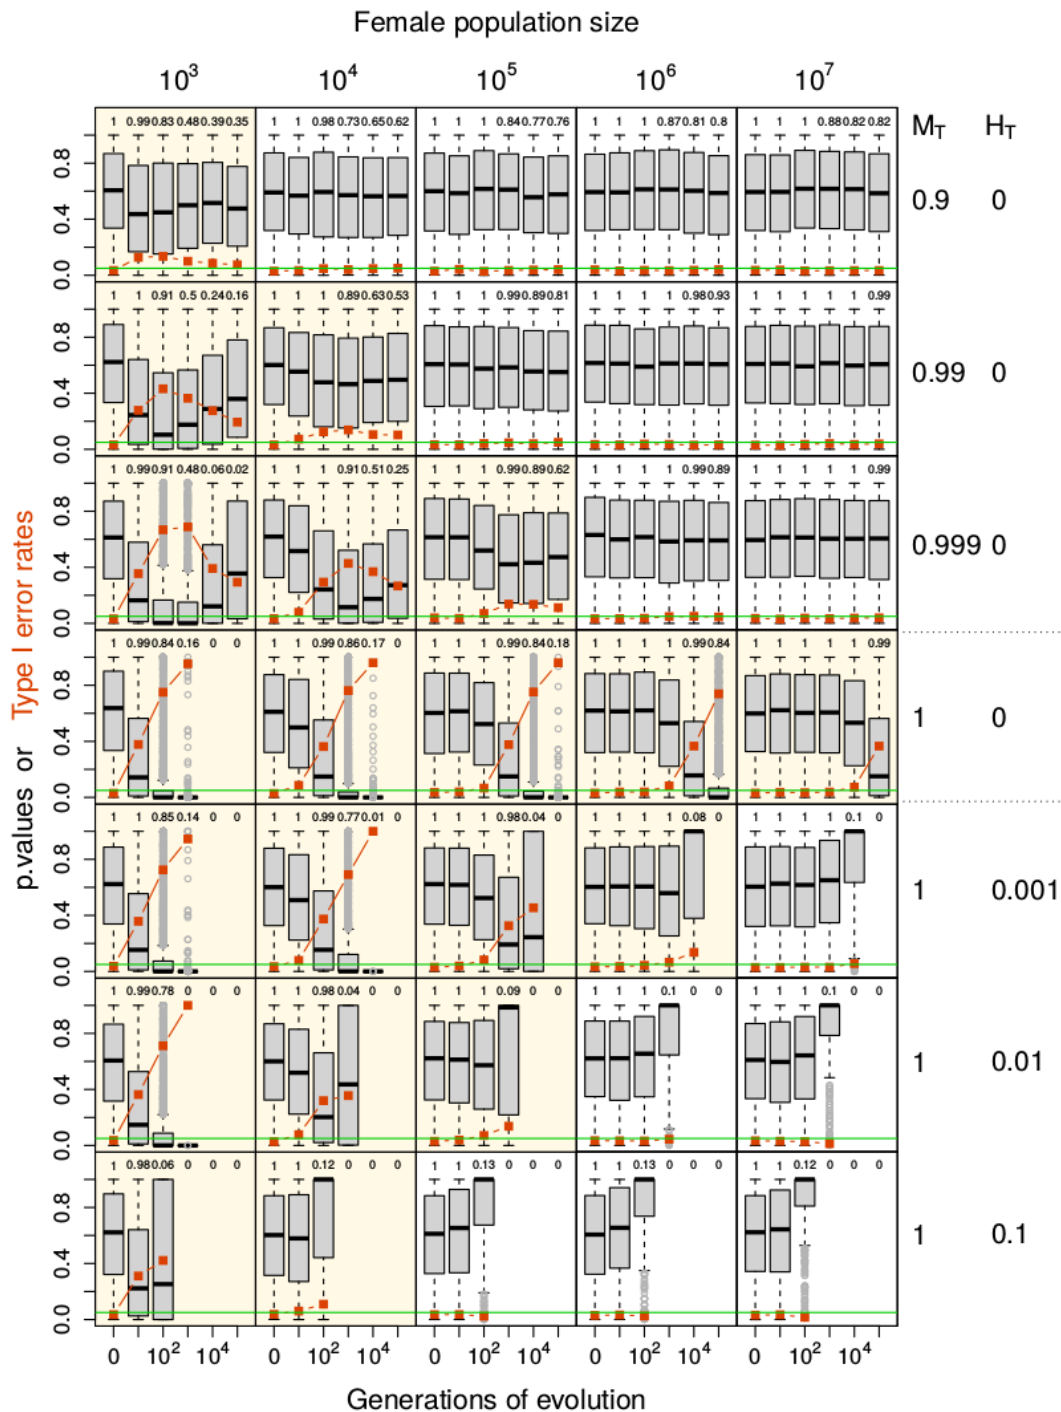

687
